# Supplementary material for: Convergent Akt activation drives acquired EGFR inhibitor resistance in lung cancer
Source: Nat Commun. 2017 Sep 4;8:410. doi: 10.1038/s41467-017-00450-6 (PMC5583255; doi:10.1038/s41467-017-00450-6)
Supplement: Supplementary file 1 — Supplementary Information [file 41467_2017_450_MOESM1_ESM.pdf]

### **Description of Supplementary Files**

File Name: Supplementary Information

Description: Supplementary Figures and Supplementary Tables

File Name: Peer Review File

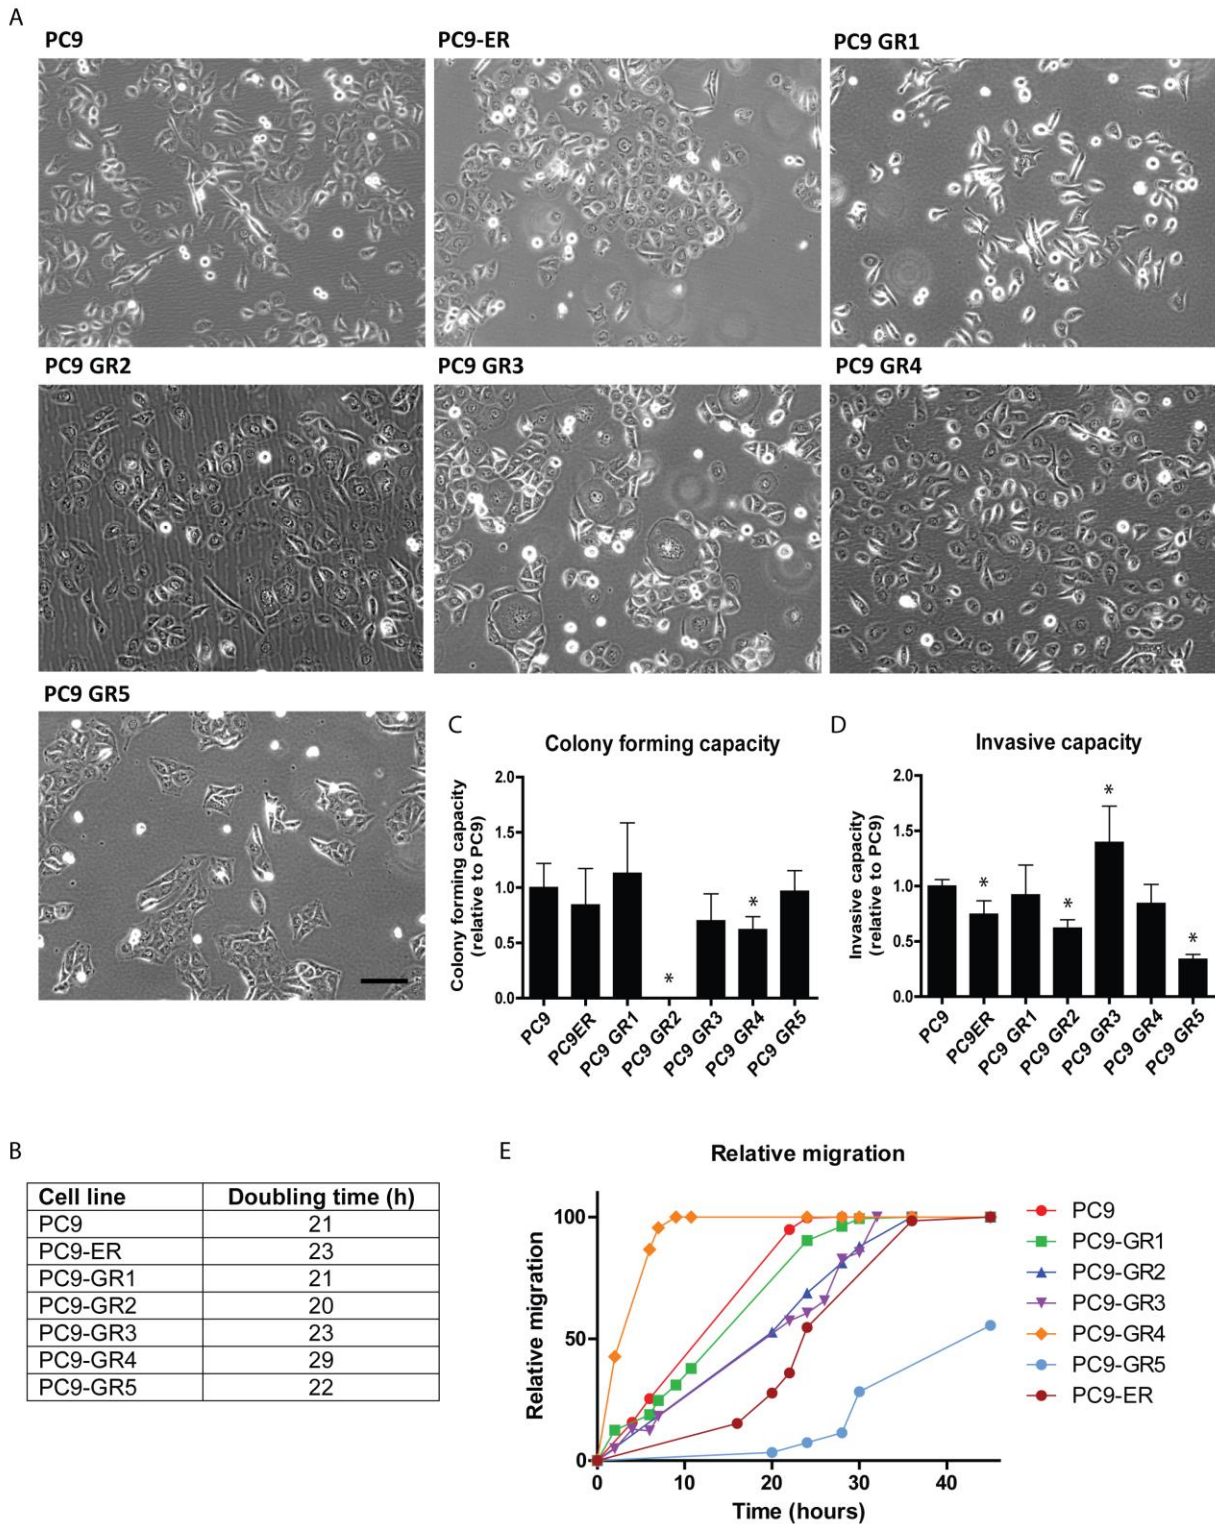

**Supplementary Figure 1. Characterization of the EGFR TKI resistant PC9 derived cell lines.**

(a) Microscopic photographs of the parental and resistant PC9 cells. Scale bar, 100  $\mu$ m. (b) Doubling times. (c) Colony formation capacity in soft agar of the EGFR TKI resistant cell lines compared to parental PC9. The asterisks indicate significant differences ( $p < 0.05$  in Student's t test). (d) Basement membrane invasive capacity of the EGFR TKI resistant cell lines compared to parental PC9. The asterisks indicate significant differences ( $p < 0.05$  in Student's t test). (e) Migration expressed as % closure of the initial 0.68 mm<sup>2</sup> cell-free region.

a

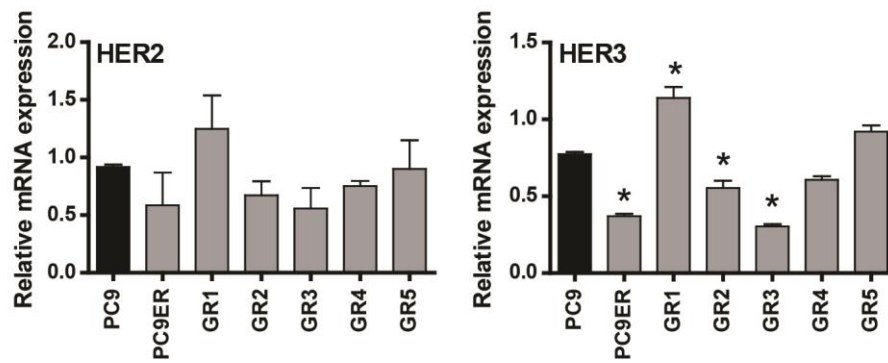

**Supplementary Figure 2. RNA expression of HER2 and HER3 in PC9 and its derived resistant cell lines.** Data are based on three independent experiments. Asterisks indicate significant difference in ANOVA 1-way test ( $p < 0.05$ ) between PC9 and the resistant cell lines.

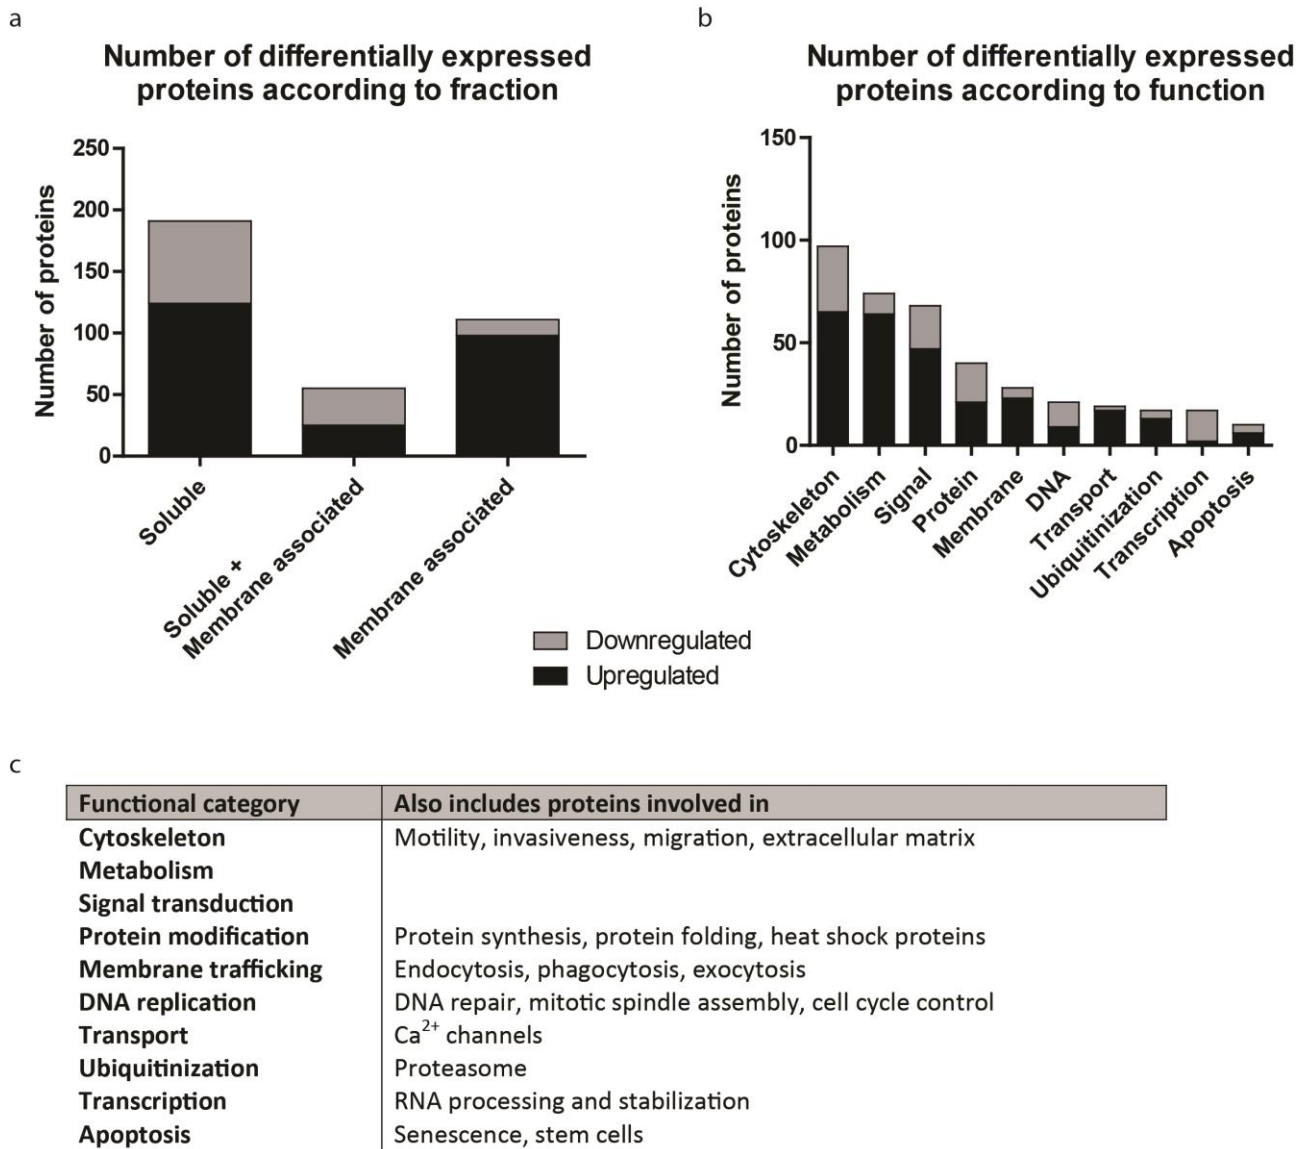

**Supplementary Figure 3. Total number of proteins differentially expressed in the EGFR TKI resistant cell line PC9-ER versus the PC9 parental cells. (a)** Classified according to fraction. **(b)** Classified according to function. **(c)** Details of the functional classification employed.

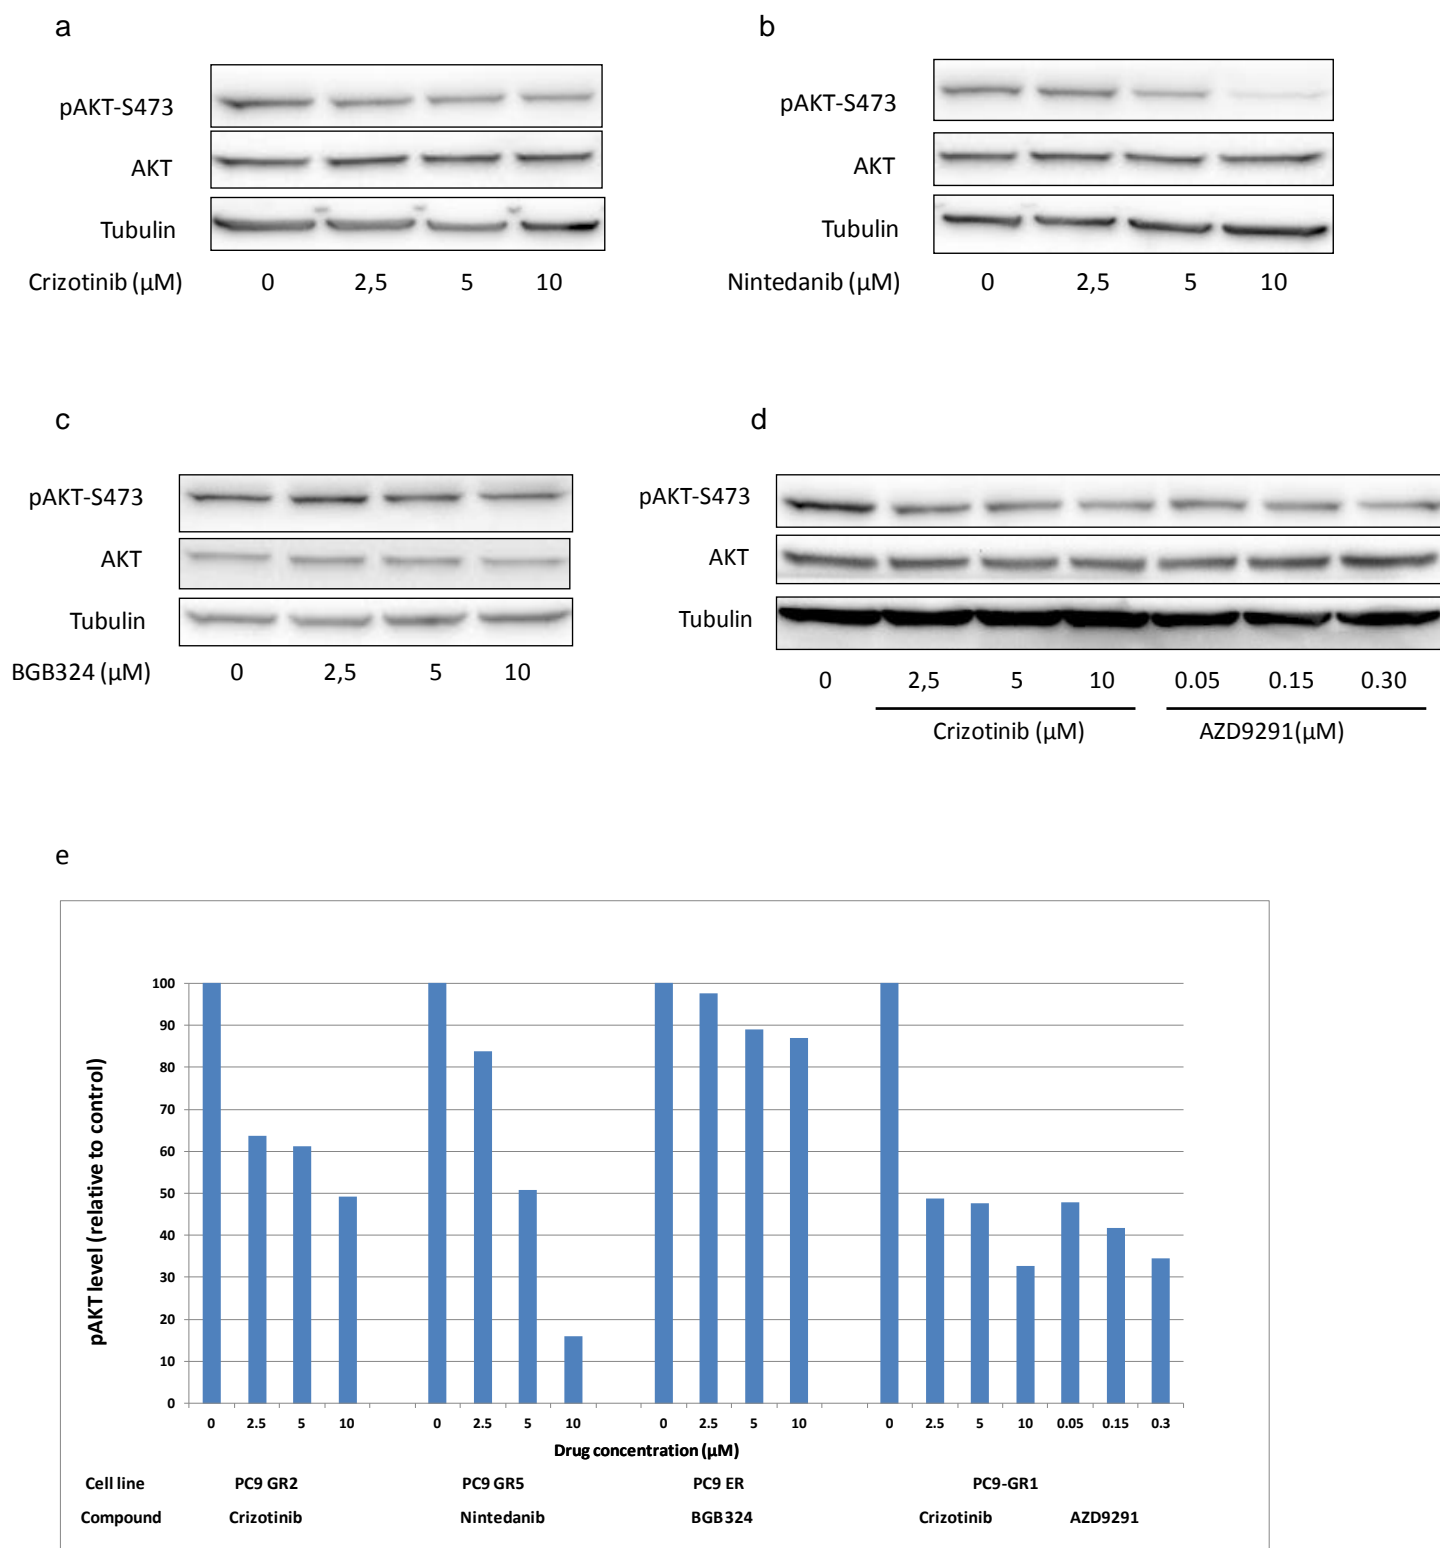

**Supplementary Figure 4. Effect of TKIs on Akt phosphorylation in selected resistant PC9 cells.** (a) Western blot analysis of PC9-GR2 treated for 2 h with crizotinib (2.5-10  $\mu\text{M}$ ); (b) Western blot analysis of PC9-GR5 treated for 2 h with nintedanib (2.5-10  $\mu\text{M}$ ); (c) Western blot analysis of PC9-ER treated for 2 h with BGB324 (2.5-10  $\mu\text{M}$ ); (d) Western blot analysis of PC9-GR1 treated for 2 h with crizotinib or AZD9291 (e) quantification of the pAKT bands, normalized to total AKT.

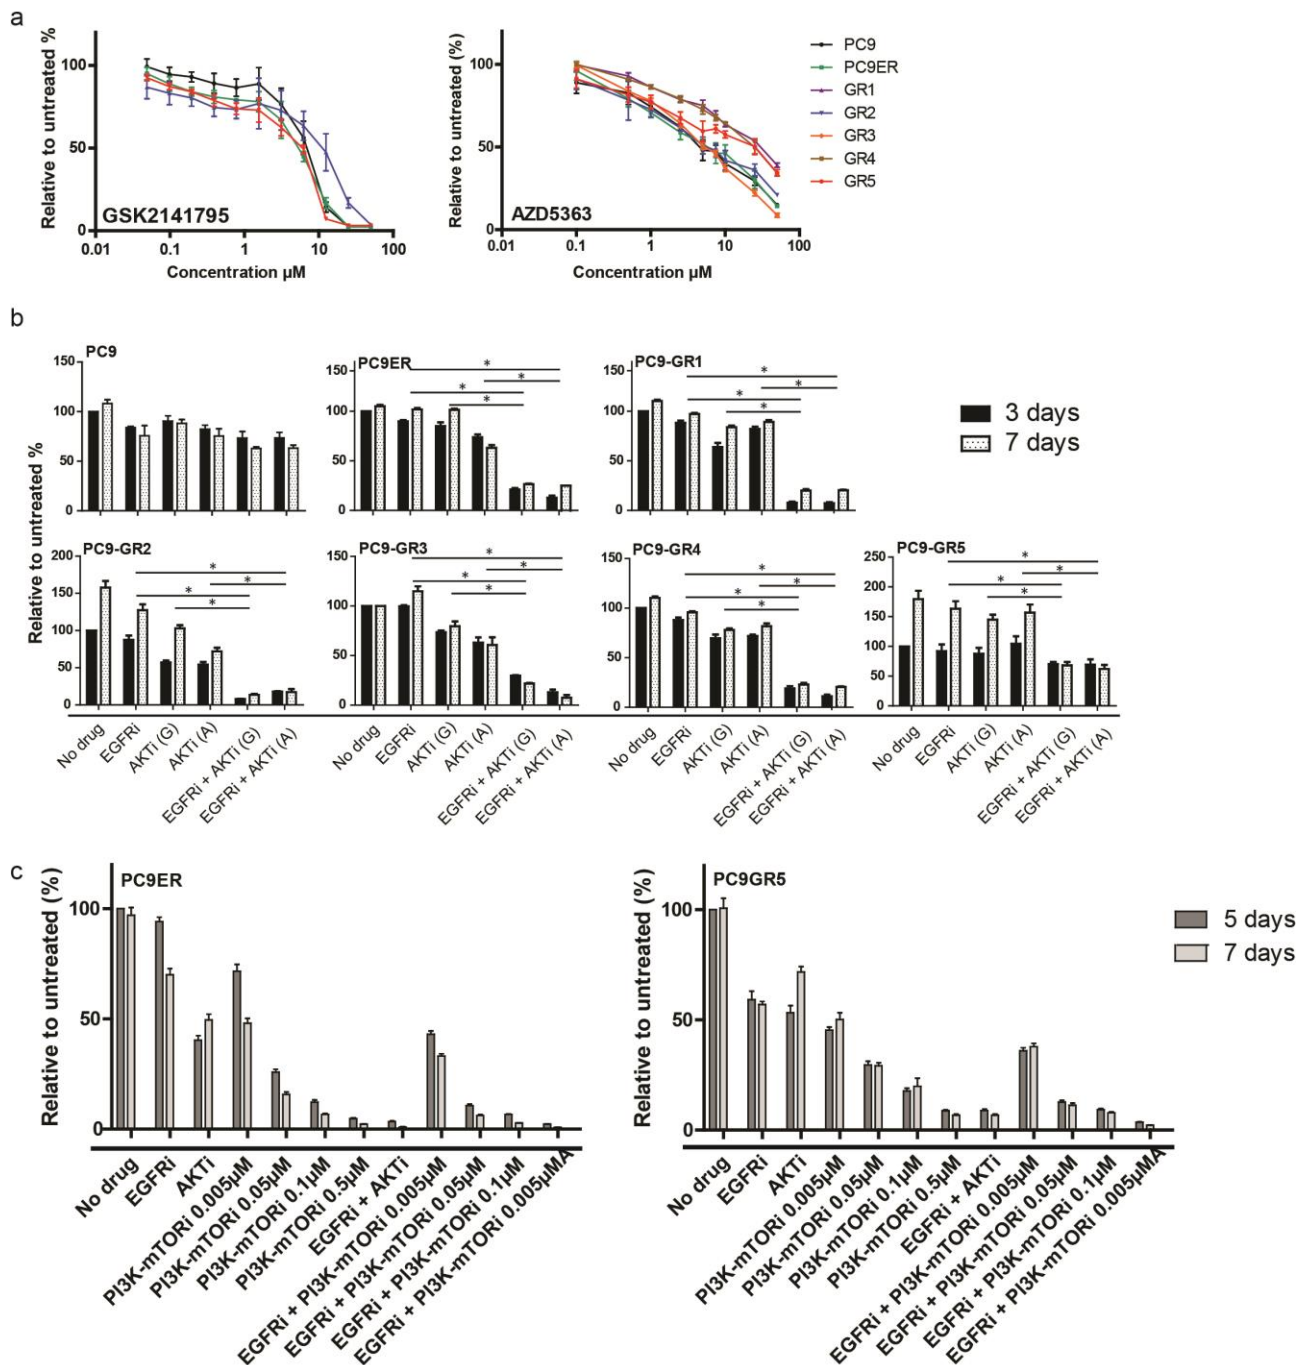

**Supplementary Figure 5. Synergistic effects of EGFR TKIs combined with Akt or mTOR inhibitors in EGFR TKI-resistant PC9 cells.** (a) Growth inhibitory effect of two selective ATP competitive Akt inhibitors, GSK2141795 and AZD5363 were assessed using CellTiterBlue assay. Cells were incubated for 72h. Concentrations of drugs were chosen to be sub-inhibitory to explore the synergistic potential: erlotinib 30  $\mu\text{M}$ ; gefitinib 5  $\mu\text{M}$  (except for PC9 where 40nM was used); GSK2141795 (G) 2.5  $\mu\text{M}$ ; AZD5363 (A) 35  $\mu\text{M}$ , (except for GR2 and GR5 where 1.25 and 3  $\mu\text{M}$  were employed). Results are mean of seven replicates  $\pm$ SD. (b) CellTiterBlue assay assessing the combinatorial effect of EGFR TKIs combined with Akt inhibitors. “EGFRi” denotes either erlotinib or gefitinib. “AKTi (G)” denotes GSK2141795. “AKTi (A)” denotes AZD5363. Asterisks indicate significant difference in ANOVA 1-way test ( $p < 0.05$ ) between the drug combination treated cells and cells treated with either drug alone. For PC9-GR5, significance is only associated with measurements at the day 7 time point. (c) CellTiterGlo assay assessing the combinatorial effect of EGFR TKIs combined with the Akt inhibitor GSK2141795 or the PI3K-mTOR inhibitor GSK2126458.

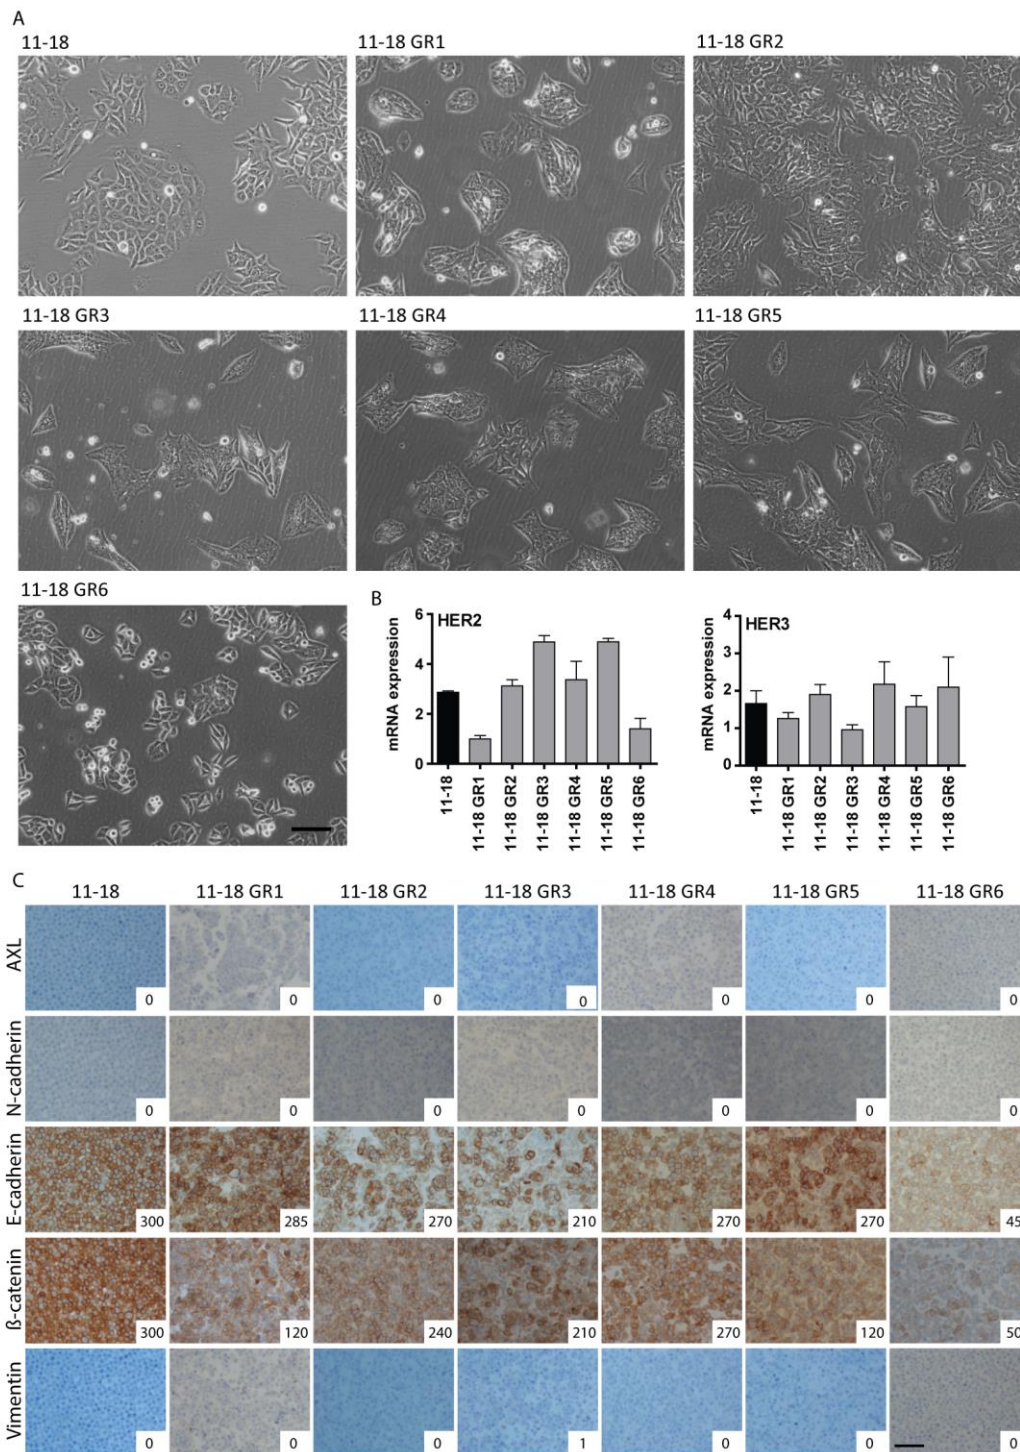

**Supplementary Figure 6. Characterization of the EGFR TKI resistant 11-18 derived cell lines.**

(a) Microscopic photographs of the parental and EGFR TKI resistant 11-18 cell lines. Scale bar, 100  $\mu$ m. (b) RNA expression of HER2 and HER3 in 11-18 and its derived resistant cell lines. Data are based on three independent experiments. (c) Immunohistochemistry of selected EMT markers in the 11-18 cell lines. 11-18 GR1-6 cell lines exhibit slightly lower E-cadherin and  $\beta$ -catenin expression compared to 11-18. None of the cell lines show expression of AXL, N-cadherin or vimentin. Scale bar, 100  $\mu$ m.

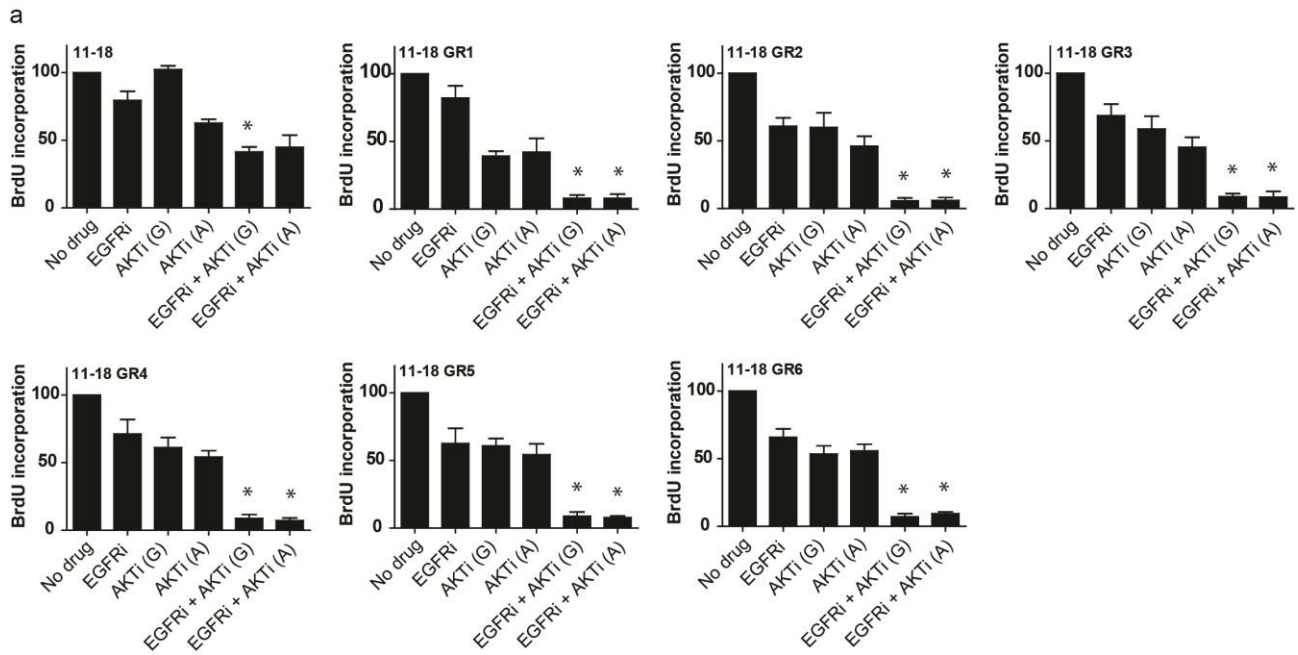

**Supplementary Figure 7. Growth inhibitory effect of the combination of gefitinib with either of the two Akt inhibitors, GSK2141795 and AZD5363, on different 11-18 resistant cell lines as evaluated using a BrdU incorporation assays.** (a) BrdU incorporation assay performed after 96h incubation. Data are mean of triplicates  $\pm$  SD. Asterisks indicate significant difference in ANOVA 1-way test ( $p < 0.05$ ) for the drug combination treated cells compared to cells treated with either drug alone.

a

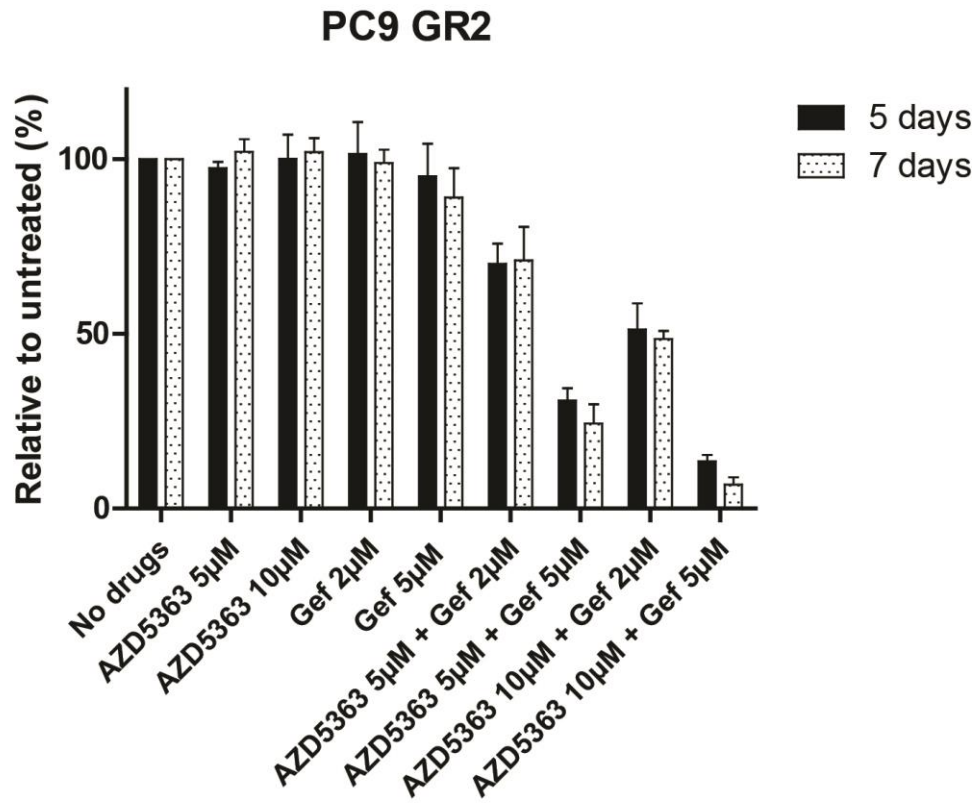

b

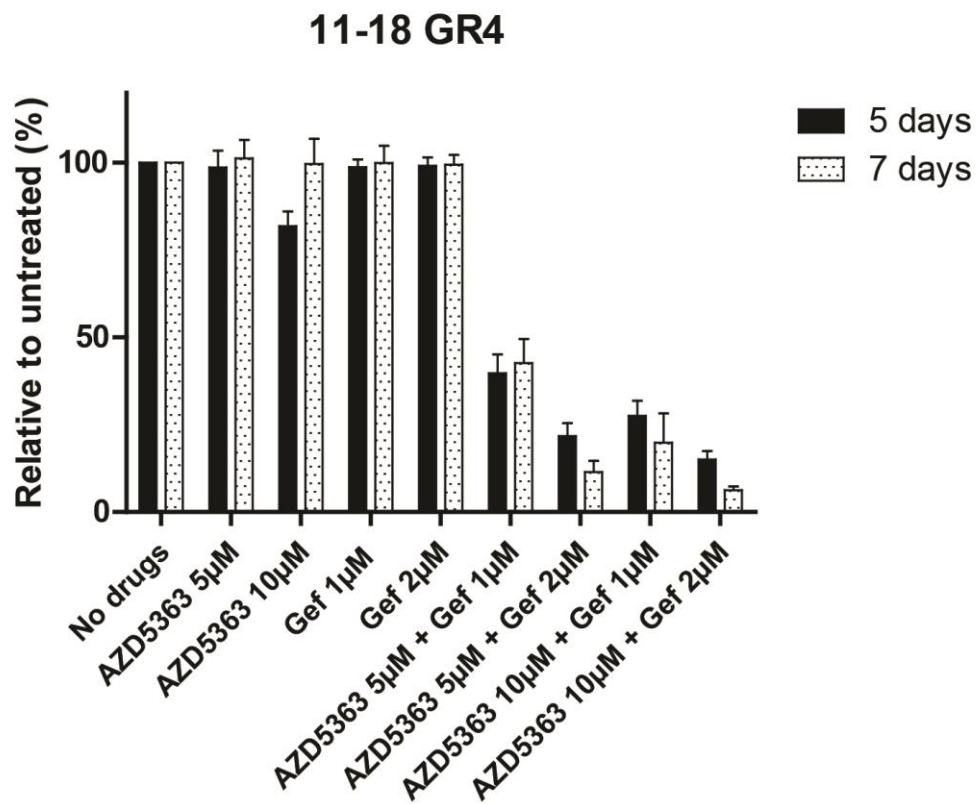

**Supplementary Figure 8. Synergistic effects of EGFR TKIs and Akt inhibitors at physiologic concentrations.** The combined effects of EGFR inhibitors (gefitinib) and Akt inhibitor (AZD5363) were assessed in the gefitinib-resistant NSCLC cell lines (a) PC9 GR2 and (b) 11-18 GR4 by crystal violet viability assay performed over seven days.

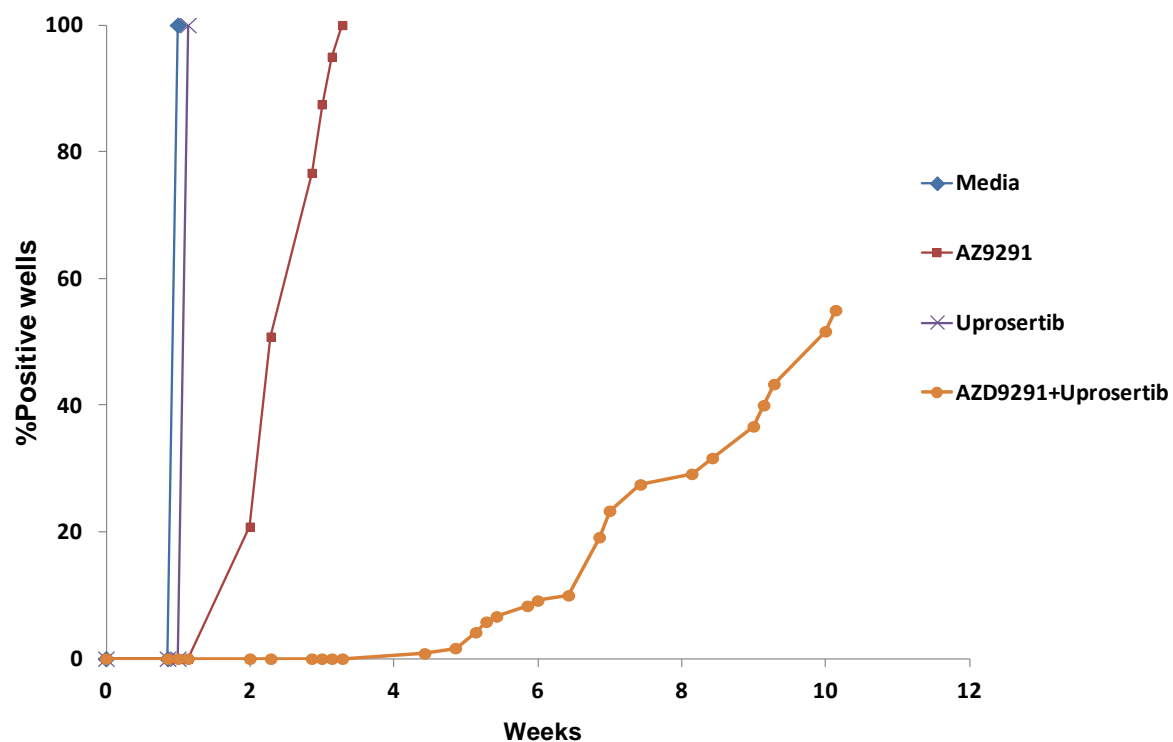

**Supplementary Figure 9. Effects of Akt inhibitor (uprosertib) on the acquisition of resistance to osimertinib in PC9-GR4 cells.** Cells were treated with DMSO control (media), 20 nM osimertinib (AZD9291), 250 nM uprosertib (GSK2141795) or both (2 plates = 120 wells per treatment). The percentage of wells at 50% or greater confluence (positive wells) was assessed daily. The y-axes indicate weeks to confluence.

**a** Vehicle

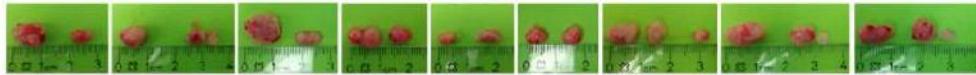

Erlotinib

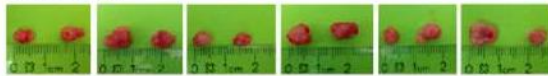

GSK2141795

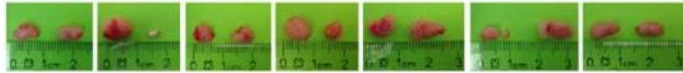

Erlotinib + GSK2141795

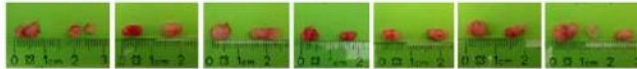

**b**

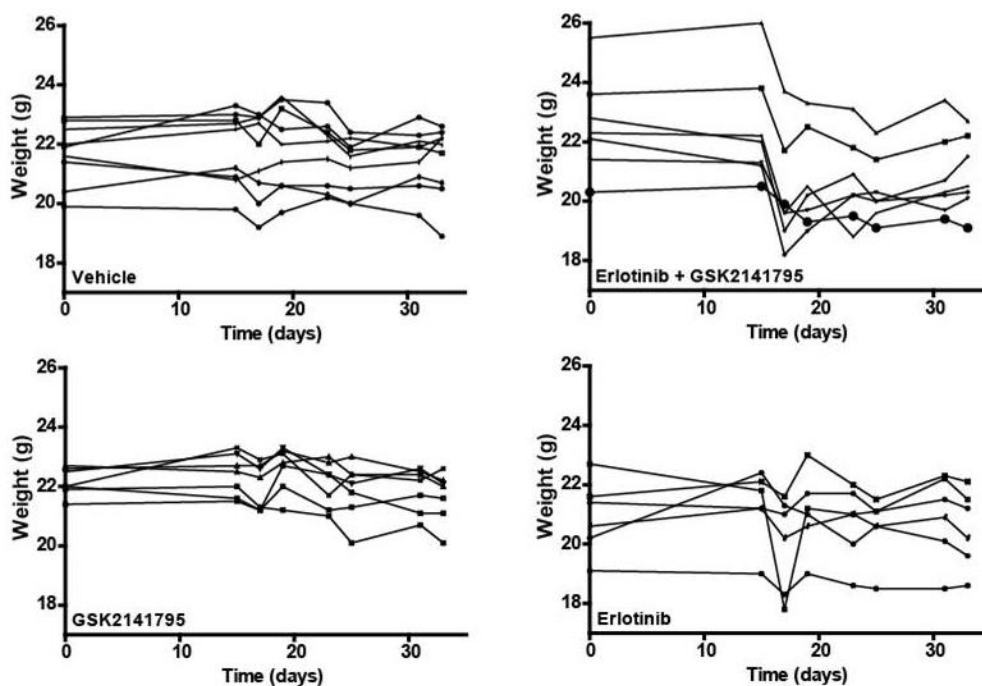

**Supplementary Figure 10. Assessment of the *in vivo* effect of erlotinib combined with GSK2141795.** (a) Photographs of tumors after being excised from mice. Each mouse harbored two tumors. (b) Assessment of the bodyweight of the animals during the tumor cell transplantation and treatment period.

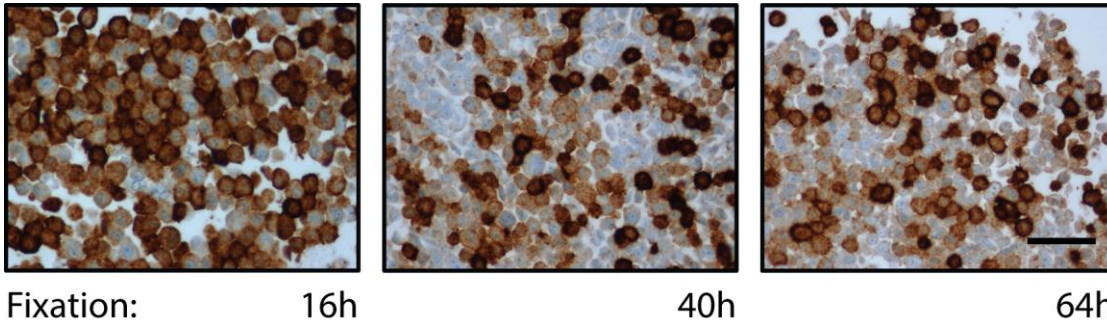

**Supplementary Figure 11. Stability of pAkt in immunohistochemical analysis.** PC3 cancer cells were fixed with formaldehyde 4x at different time-points (16h, 40h and 64h) to demonstrate that phospho-AKT staining is robust. Phospho-AKT is observed in the cytoplasm of PC3 cell line and with high intensity staining independently of the fixation time. For each experiment, a sample with either an isotype-matched antibody or no primary antibody was included as control. For validation of the pAKT antibody staining a panel of breast cancers with known pAKT levels was used. Scale bar, 100  $\mu$ m. Magnification 100x.

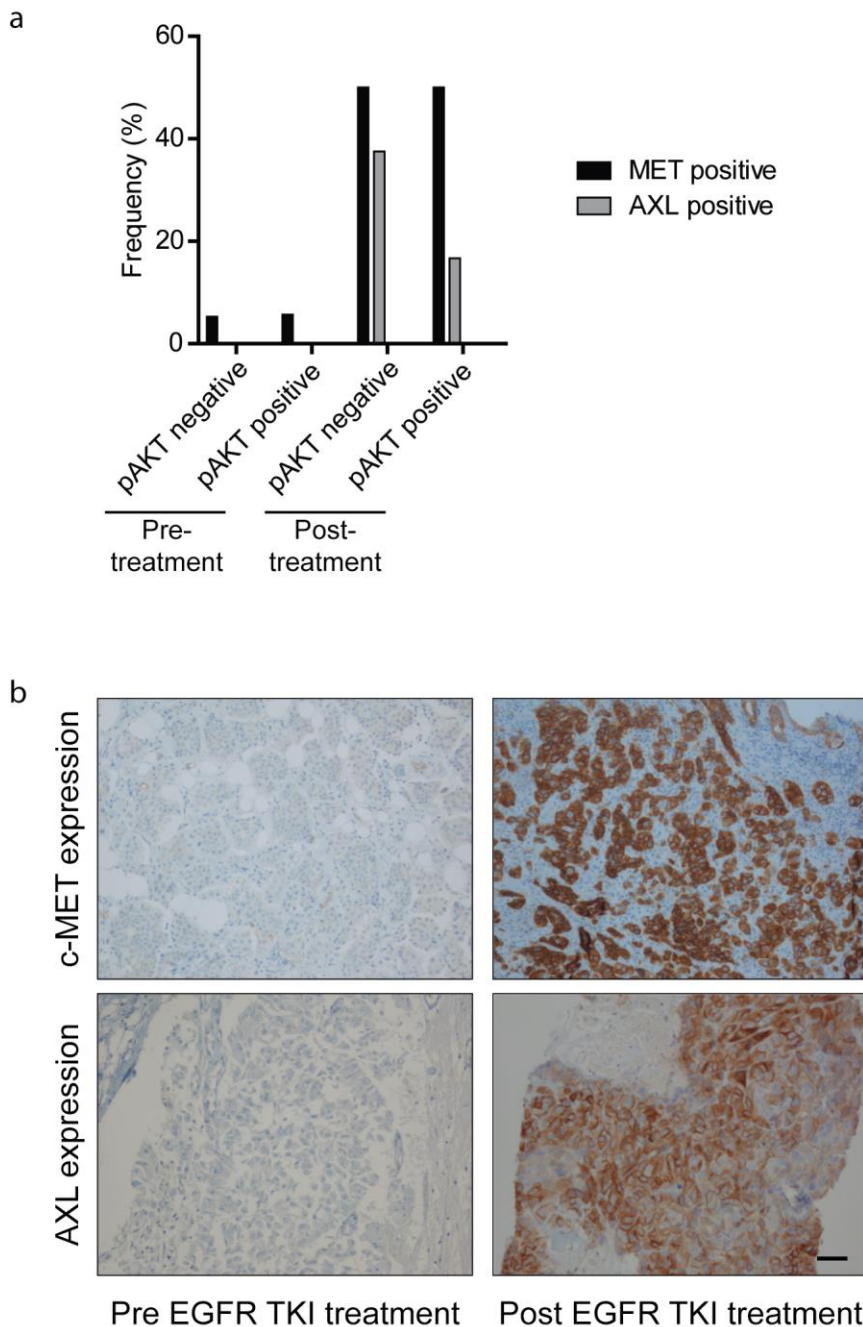

**Supplementary Figure 12. Assessment of AXL and c-MET expression in pre- and post-treatment clinical samples.** (a) Bar graph showing percentage of c-MET-positive and AXL-positive within the pAKT-positive or -negative EGFR-mutant NSCLC patients at baseline and after progressing on treated with first line EGFR-TKIs. (b) Representative negative and positive immunohistochemical staining of c-MET and AXL. Scale bar, 100  $\mu$ m.

**Supplementary Table 1. Genotyping of parental PC9 and derived cell lines.**

| Gene   | Codons/Exons analyzed | PC9                     | PC9-ER                  | PC9-GR1                 | PC9-GR2                 | PC9-GR3                 | PC9-GR4                 | PC9-GR5                 |
|--------|-----------------------|-------------------------|-------------------------|-------------------------|-------------------------|-------------------------|-------------------------|-------------------------|
| EGFR*  | Exon 19               | Del 15 pb (p.E746-A750) |
|        | Exon 20               | wt                      | wt                      | T790M                   | wt                      | wt                      | T790M                   | wt                      |
|        | Exons 18, 21          | wt                      |
| TP53   | Exon 7                | p.R248Q                 |
| KRAS   | Exon 2                | wt                      |
| BRAF   | Codon 600             | wt                      |
| CTBNN1 | Exon 3                | wt                      |
| PIK3CA | Codons 542, 545, 1047 | wt                      |

\* The resistant cell lines were characterized for hotspot mutations in several genes (EGFR, KRAS, BRAF, PIK3CA, TP53, CTNNB1) (Supplementary table 1) by standard PCR followed by Sanger sequencing. To further authenticate cell line identity, short tandem repeat (STR) analysis was performed using the Cell ID™ System (G9500, Promega, Madison, USA) as described by the manufacturer. Ten specific loci of the human genome are PCR amplified and analyzed by capillary electrophoresis. All resistant clones of this study to have the same allelic sizes at all ten loci as the parental cells.

**Supplementary Table 2. Sensitivity of parental PC9 and derived cell lines to EGFR TKI.**

| Cell line      | Gefitinib |          | Erlotinib |          | Afatinib  |          | Dacomitinib |          | AZD9291   |          |
|----------------|-----------|----------|-----------|----------|-----------|----------|-------------|----------|-----------|----------|
|                | IC50 (μM) | % (1 μM) | IC50 (μM) | % (1 μM) | IC50 (μM) | % (1 μM) | IC50 (μM)   | % (1 μM) | IC50 (μM) | % (1 μM) |
| <b>PC9</b>     | 0.04      | 2%       | 0.0049    | 2%       | 0.003     | 17%      | 0.007       | 24%      | 0.1       | 20%      |
| <b>PC9ER</b>   | 12.6      | 88%      | 28.6      | 95%      | 3.4       | 83%      | 2.8         | 98%      | 3.1       | 100%     |
| <b>PC9-GR1</b> | 12.2      | 96%      | 4.83      | 98%      | 0.3       | 25%      | 0.3         | 27%      | 0.1       | 22%      |
| <b>PC9-GR2</b> | 14.9      | 85%      | 25.0      | 87%      | 3.9       | 84%      | 2.9         | 73%      | 2.4       | 83%      |
| <b>PC9-GR3</b> | 15.3      | 83%      | 33.7      | 100%     | 5.8       | 100%     | 3.5         | 89%      | 4.6       | 100%     |
| <b>PC9-GR4</b> | 6.5       | 91%      | 3.8       | 92%      | 0.5       | 30%      | 0.3         | 28%      | 0.2       | 23%      |
| <b>PC9-GR5</b> | 18.1      | 86%      | 21.8      | 96%      | 2.0       | 58%      | 2.1         | 64%      | 4.2       | 75%      |

% (1 μM) indicates the percentage of surviving cells at 1 μM of drug. Values are the mean of a minimum of three replicate experiments.

**Supplementary Table 3. Summary of mechanisms of resistance in PC9-derived EGFR TKI-resistant cell lines.** T790M mutation was assessed by sequencing. AXL overexpression was assessed by IHC, qRT-PCR and Western blotting. FGFR1 overexpression was assessed by qRT-PCR and Western blotting. MET activation was assessed by qRT-PCR and Western blotting. EphA2 activation was assessed by Western blotting.

| Cell line | T790M mutation | AXL overexpression | FGFR1 overexpression | MET activation | EphA2 activation |
|-----------|----------------|--------------------|----------------------|----------------|------------------|
| PC9-ER    | -              | +                  | -                    | -              | +                |
| PC9-GR1   | +              | -                  | -                    | +              | +                |
| PC9-GR2   | -              | +                  | -                    | +              | -                |
| PC9-GR3   | -              | +                  | -                    | -              | -                |
| PC9-GR4   | +              | +                  | -                    | -              | +                |
| PC9-GR5   | -              | +                  | +                    | -              | -                |

**Supplementary Table 4. Synergism between EGFR TKIs and Akt inhibitors.** Effect of the drug combination was determined to be additive (A) or synergistic (S) for the following assays: crystal violet, CellTiterBlue and BrdU incorporation. Values of  $\geq 1$  are additive, whereas values  $< 1$  are synergistic.

|                                                           | PC9   | PC9-ER | PC9-GR1 | PC9-GR2 | PC9-GR3 | PC9-GR4 | PC9-GR5 |
|-----------------------------------------------------------|-------|--------|---------|---------|---------|---------|---------|
| <b>Synergistic coefficient<br/>Crystal violet</b>         | 1.012 | 0.000  | 0.079   | 0.189   | 0.196   | 0.152   | 0.801   |
| <b>Result</b>                                             | A     | S      | S       | S       | S       | S       | S       |
| <b>Synergistic coefficient<br/>CellTiterBlue</b>          | 1.020 | 0.269  | 0.269   | 0.164   | 0.237   | 0.338   | 0.516   |
| <b>Result</b>                                             | A     | S      | S       | S       | S       | S       | S       |
| <b>Synergistic coefficient<br/>BrdU<br/>incorporation</b> | 0.251 | 0.058  | 0.052   | 0.165   | 0.358   | 0.100   | 0.022   |
| <b>Result</b>                                             | S     | S      | S       | S       | S       | S       | S       |

|                                                           | 11-18 | 11-18 GR1 | 11-18 GR2 | 11-18 GR3 | 11-18 GR4 | 11-18 GR5 | 11-18 GR6 |
|-----------------------------------------------------------|-------|-----------|-----------|-----------|-----------|-----------|-----------|
| <b>Synergistic coefficient<br/>CellTiterBlue</b>          | 0.68  | 0.12      | 0.13      | 0.11      | 0.14      | 0.08      | 0.10      |
| <b>Result</b>                                             | S     | S         | S         | S         | S         | S         | S         |
| <b>Synergistic coefficient<br/>BrdU<br/>incorporation</b> | 0.901 | 0.229     | 0.211     | 0.271     | 0.186     | 0.229     | 0.255     |
| <b>Result</b>                                             | A     | S         | S         | S         | S         | S         | S         |

**Supplementary Table 5. Synergism for EGFR inhibitors combined with either GSK2141795 or GSK2126458.** Effect of the drug combination was determined to be additive (A) or synergistic (S). Values of  $\geq 1$  are additive, whereas values  $< 1$  are synergistic.

|                                              |                            | 5 days |        | 7 days |        |
|----------------------------------------------|----------------------------|--------|--------|--------|--------|
|                                              |                            | PC9ER  | PC9GR5 | PC9    | PC9GR5 |
| Erlotinib +<br>GSK2141795<br>(2.5 $\mu$ M)   | Synergistic<br>coefficient | 0.094  | 0.283  | 0.027  | 0.167  |
|                                              | Result                     | S      | S      | S      | S      |
| Erlotinib +<br>GSK2126458<br>(0.005 $\mu$ M) | Synergistic<br>coefficient | 0.638  | 1.342  | 0.956  | 1.334  |
|                                              | Result                     | S      | A      | D      | A      |
| Erlotinib +<br>GSK2126458<br>(0.05 $\mu$ M)  | Synergistic<br>coefficient | 0.442  | 0.725  | 0.54   | 0.682  |
|                                              | Result                     | S      | S      | S      | S      |
| Erlotinib +<br>GSK2126458<br>(0.1 $\mu$ M)   | Synergistic<br>coefficient | 0.578  | 0.884  | 0.582  | 0.706  |
|                                              | Result                     | S      | S      | S      | S      |
| Erlotinib +<br>GSK2126458<br>(0.5 $\mu$ M)   | Synergistic<br>coefficient | 0.508  | 0.695  | 0.479  | 0.579  |
|                                              | Result                     | S      | S      | S      | S      |

**Supplementary Table 6. IC50 for gefitinib for the 11-18 parental and resistant cell lines.**

| <b>Cell line</b> | <b>IC50 Gefitinib<br/>(<math>\mu</math>M)</b> |
|------------------|-----------------------------------------------|
| <b>11-18</b>     | 0.3                                           |
| <b>11-18 GR1</b> | 27.1                                          |
| <b>11-18 GR2</b> | 8.0                                           |
| <b>11-18 GR3</b> | 27.4                                          |
| <b>11-18 GR4</b> | 20.6                                          |
| <b>11-18 GR5</b> | 20.8                                          |
| <b>11-18 GR6</b> | 8.1                                           |

**Supplementary Table 7. Patient characteristics of 75 patients with EGFR mutant NSCLC treated with first line EGFR TKIs (pre-treatment samples).**

| <b>Clinical characteristics of the 75 patients (pre-treatment samples)</b> |           |
|----------------------------------------------------------------------------|-----------|
| <b>Sex—no. (%)</b>                                                         |           |
| Male                                                                       | 21 (28.0) |
| Female                                                                     | 54 (72.0) |
| <b>Age—yr</b>                                                              |           |
| Median                                                                     | 64        |
| Range                                                                      | 35–89     |
| <b>ECOG*performance status — no. (%)</b>                                   |           |
| 0                                                                          | 18 (24.0) |
| 1                                                                          | 37 (49.3) |
| 2                                                                          | 17 (22.7) |
| 3                                                                          | 3 (4.0)   |
| <b>Smoking status — no. (%)</b>                                            |           |
| Never smoked                                                               | 50 (66.7) |
| Former smoker                                                              | 20 (26.7) |
| Current smoker                                                             | 5 (6.7)   |
| <b>Disease stage — no. (%)</b>                                             |           |
| IIIB                                                                       | 14 (18.7) |
| IV                                                                         | 61 (81.3) |
| <b>Brain metastasis — no. (%)</b>                                          |           |
| No                                                                         | 52 (69.3) |
| Yes                                                                        | 23 (30.7) |
| <b>Bone metastasis— no. (%)</b>                                            |           |
| No                                                                         | 42 (56.0) |
| Yes                                                                        | 33 (44.0) |
| <b>Type of EGFR mutation— no. (%)</b>                                      |           |
| Exon 19 deletion                                                           | 51 (68.0) |
| L858R                                                                      | 23 (30.7) |

|                                  |           |
|----------------------------------|-----------|
| Other**                          | 1 (1.3)   |
| <b>Type of EGFR TKI— no. (%)</b> |           |
| Erlotinib                        | 44 (58.7) |
| Gefitinib                        | 29 (38.7) |
| Afatinib                         | 2 (2.6)   |

\* ECOG, Eastern Cooperative Oncology Group

\*\*Other, exon 20 insertion

**Supplementary Table 8. Evaluation of common mechanisms of resistance to EGFR TKI in pre-treatment clinical samples.** The expression of AXL, MET, HER2 and FGFR1 were evaluated in pre-treatment tumor samples where additional tissue was available and correlated with the pAkt expression. Hotspot mutations in *PIK3CA* were also tested using DNA extracted from Hematoxylin & Eosin or IHC slides.

| ID | pAKTlevel<br>pos/neg | MET expression<br>pos/neg | AXL expression<br>pos/neg | FGFR1<br>expression<br>pos/neg | HER2 expression<br>pos/neg | PIK3CA genotype |
|----|----------------------|---------------------------|---------------------------|--------------------------------|----------------------------|-----------------|
| 1  | NEG                  | NEG                       | NEG                       | POS                            | NEG                        | ND              |
| 2  | NEG                  | NEG                       | NEG                       | POS                            | NEG                        | wt              |
| 3  | NEG                  | NEG                       | NEG                       | NEG                            | NEG                        | wt              |
| 4  | NEG                  | NEG                       | NEG                       | POS                            | NEG                        | wt              |
| 5  | NEG                  | NEG                       | NEG                       | NEG                            | NEG                        | wt              |
| 6  | NEG                  | NEG                       | NEG                       | NEG                            | NEG                        | E542K           |
| 7  | NEG                  | NEG                       | NEG                       | POS                            | NEG                        | wt              |
| 8  | NEG                  | NEG                       | NEG                       | NEG                            | NEG                        | wt              |
| 9  | NEG                  | NEG                       | NEG                       | NEG                            | NEG                        | wt              |
| 10 | NEG                  | NEG                       | NEG                       | NEG                            | NEG                        | wt              |
| 11 | NEG                  | NEG                       | NEG                       | POS                            | NEG                        | wt              |
| 12 | NEG                  | NEG                       | NEG                       | NEG                            | NEG                        | wt              |
| 13 | NEG                  | NEG                       | NEG                       | NEG                            | NEG                        | wt              |
| 14 | NEG                  | NEG                       | NEG                       | POS                            | NEG                        | wt              |
| 15 | NEG                  | NEG                       | NEG                       | POS                            | NEG                        | wt              |
| 16 | NEG                  | NEG                       | NEG                       | NEG                            | NEG                        | wt              |
| 17 | NEG                  | NEG                       | NEG                       | POS                            | NEG                        | wt              |
| 18 | NEG                  | NEG                       | NEG                       | NEG                            | NEG                        | wt              |
| 19 | NEG                  | POS                       | NEG                       | NEG                            | NEG                        | wt              |
| 20 | NEG                  | NEG                       | NEG                       | POS                            | NEG                        | wt              |
| 21 | NEG                  | NEG                       | NEG                       | NEG                            | NEG                        | wt              |
| 22 | NEG                  | ND                        | NEG                       | ND                             | ND                         | wt              |
| 23 | NEG                  | NEG                       | NEG                       | POS                            | NEG                        | wt              |
| 24 | NEG                  | POS                       | NEG                       | ND                             | ND                         | ND              |
| 25 | NEG                  | NEG                       | NEG                       | NEG                            | NEG                        | ND              |
| 26 | NEG                  | NEG                       | NEG                       | NEG                            | NEG                        | wt              |
| 27 | NEG                  | NEG                       | NEG                       | NEG                            | NEG                        | wt              |
| 28 | NEG                  | NEG                       | NEG                       | NEG                            | NEG                        | wt              |
| 29 | NEG                  | NEG                       | ND                        | ND                             | ND                         | ND              |
| 30 | NEG                  | NEG                       | ND                        | ND                             | ND                         | wt              |
| 31 | POS                  | NEG                       | NEG                       | NEG                            | NEG                        | ND              |
| 32 | POS                  | NEG                       | NEG                       | POS                            | NEG                        | wt              |
| 33 | POS                  | NEG                       | ND                        | ND                             | ND                         | wt              |
| 34 | POS                  | NEG                       | ND                        | ND                             | ND                         | wt              |
| 35 | POS                  | NEG                       | NEG                       | POS                            | ND                         | wt              |
| 36 | POS                  | NEG                       | NEG                       | NEG                            | NEG                        | E545K           |
| 37 | POS                  | POS                       | ND                        | ND                             | ND                         | wt              |
| 38 | POS                  | NEG                       | NEG                       | POS                            | NEG                        | wt              |
| 39 | NEG                  | ND                        | ND                        | ND                             | ND                         | wt              |
| 40 | NEG                  | ND                        | ND                        | ND                             | ND                         | wt              |
| 41 | NEG                  | ND                        | ND                        | ND                             | ND                         | wt              |
| 42 | NEG                  | ND                        | ND                        | ND                             | ND                         | wt              |
| 43 | NEG                  | ND                        | ND                        | ND                             | ND                         | wt              |

|    |     |    |    |    |    |        |
|----|-----|----|----|----|----|--------|
| 44 | NEG | ND | ND | ND | ND | wt     |
| 45 | NEG | ND | ND | ND | ND | wt     |
| 46 | NEG | ND | ND | ND | ND | wt     |
| 47 | NEG | ND | ND | ND | ND | wt     |
| 48 | NEG | ND | ND | ND | ND | wt     |
| 49 | NEG | ND | ND | ND | ND | wt     |
| 50 | NEG | ND | ND | ND | ND | wt     |
| 51 | NEG | ND | ND | ND | ND | L1047R |
| 52 | NEG | ND | ND | ND | ND | wt     |
| 53 | NEG | ND | ND | ND | ND | wt     |
| 54 | NEG | ND | ND | ND | ND | wt     |
| 55 | NEG | ND | ND | ND | ND | wt     |
| 56 | NEG | ND | ND | ND | ND | wt     |
| 57 | NEG | ND | ND | ND | ND | wt     |
| 58 | NEG | ND | ND | ND | ND | wt     |
| 59 | NEG | ND | ND | ND | ND | wt     |
| 60 | NEG | ND | ND | ND | ND | wt     |
| 61 | NEG | ND | ND | ND | ND | wt     |
| 62 | NEG | ND | ND | ND | ND | wt     |
| 63 | NEG | ND | ND | ND | ND | wt     |
| 64 | NEG | ND | ND | ND | ND | wt     |
| 65 | NEG | ND | ND | ND | ND | wt     |
| 66 | NEG | ND | ND | ND | ND | wt     |
| 67 | NEG | ND | ND | ND | ND | wt     |
| 68 | NEG | ND | ND | ND | ND | wt     |
| 69 | NEG | ND | ND | ND | ND | wt     |
| 70 | NEG | ND | ND | ND | ND | wt     |
| 71 | NEG | ND | ND | ND | ND | wt     |
| 72 | NEG | ND | ND | ND | ND | ND     |
| 73 | NEG | ND | ND | ND | ND | ND     |
| 74 | NEG | ND | ND | ND | ND | ND     |
| 75 | NEG | ND | ND | ND | ND | ND     |

ND, not determined.

**Supplementary Table 9. pAKT level and T790M status of EGFR TKI post-treated samples.**

| Patient # | pAKT pos/neg | pAKT<br>histoscore | T790M |
|-----------|--------------|--------------------|-------|
| 1         | POS          | 210                | POS   |
| 2         | POS          | 120                | POS   |
| 3         | NEG          | 0                  | POS   |
| 4         | NEG          | 0                  | NEG   |
| 5         | POS          | 300                | POS   |
| 6         | POS          | 285                | POS   |
| 7         | NEG          | 45                 | POS   |
| 8         | POS          | 240                | POS   |
| 9         | POS          | 180                | POS   |
| 10        | NEG          | 0                  | NEG   |
| 11        | NEG          | 0                  | POS   |
| 12        | POS          | 75                 | NEG   |
| 13        | POS          | 105                | POS   |
| 14        | POS          | 65                 | NEG   |
| 15        | NEG          | 45                 | NEG   |

\*The histoscore value of 62 was used to classify samples as positive (above 62) or negative (below 62) for pAKT

**Supplementary Table 10. Evaluation of common mechanisms of resistance to EGFR TKI in post-treatment clinical samples.**

| ID | pAKTlevel<br>pos/neg | PIK3CA<br>mutation | T790M<br>mutation | AXL expression<br>pos/neg | MET<br>amplification<br>FISH pos/neg | MET<br>expression<br>pos/neg | Vimentinexpres<br>sion pos/neg | E-cad<br>expression<br>pos/neg |
|----|----------------------|--------------------|-------------------|---------------------------|--------------------------------------|------------------------------|--------------------------------|--------------------------------|
| 1  | POS                  | wt                 | +                 | POS                       | NEG                                  | NEG                          | NEG                            | POS                            |
| 2  | POS                  | wt                 | +                 | NEG                       | NEG                                  | NEG                          | POS                            | POS                            |
| 3  | NEG                  | wt                 | +                 | NEG                       | NEG                                  | NEG                          | POS                            | POS                            |
| 4  | NEG                  | ND                 | -                 | NEG                       | ND                                   | POS                          | POS                            | POS                            |
| 5  | POS                  | wt                 | +                 | POS                       | ND                                   | ND                           | ND                             | ND                             |
| 6  | POS                  | wt                 | +                 | POS                       | POS                                  | NEG                          | POS                            | POS                            |
| 7  | NEG                  | wt                 | +                 | ND                        | NEG                                  | NEG                          | POS                            | POS                            |
| 8  | POS                  | wt                 | +                 | NEG                       | POS                                  | NEG                          | POS                            | POS                            |
| 9  | POS                  | wt                 | +                 | NEG                       | POS                                  | POS                          | NEG                            | POS                            |
| 10 | NEG                  | ND                 | -                 | NEG                       | NEG                                  | POS                          | NEG                            | POS                            |
| 11 | NEG                  | L1047R             | -                 | NEG                       | ND                                   | NEG                          | NEG                            | POS                            |
| 12 | POS                  | wt                 | -                 | NEG                       | POS                                  | POS                          | ND                             | ND                             |
| 13 | POS                  | ND                 | +                 | ND                        | ND                                   | ND                           | ND                             | ND                             |
| 14 | POS                  | ND                 | -                 | NEG                       | NEG                                  | NEG                          | ND                             | ND                             |
| 15 | NEG                  | ND                 | -                 | POS                       | POS                                  | POS                          | ND                             | ND                             |

ND, not determined.
